# Supplementary material for: In situmicrosynthesis of polyaniline: synthesis–structure–conductivity correlation
Source: Royal Society of Chemistry journal article supplement (doi:10.1039/d1nj03198h), 2021-01-01
Supplement: d1nj03198h1.pdf [file d1nj03198h1.pdf]

## Supporting information

### ***In-situ* microsynthesis of polyaniline: synthesis – structure – conductivity correlation**

Anna Vasileva<sup>1†</sup>, Dmitrii Pankin<sup>2†</sup>, Vladimir Mikhailovskii<sup>3</sup>, Ilya Kolesnikov<sup>2</sup>, Ignacio Mínguez-Bacho<sup>4</sup>, Julien Bachmann<sup>1,4</sup>, Alina Manshina<sup>1\*</sup>.

<sup>1</sup> Institute of Chemistry, St. Petersburg State University, Universitetskii pr. 26, 198504 St. Petersburg, Russia

<sup>2</sup> Center for Optical and Laser Materials Research, St. Petersburg State University, Uljanovskaya 5, 198504 St. Petersburg, Russia

<sup>3</sup> Interdisciplinary Resource Center for Nanotechnology, Research Park, Saint-Petersburg State University, Ulyanovskaya 1, Saint-Petersburg 198504, Russia

<sup>4</sup> Chemistry of Thin Film Materials, Department of Chemistry and Pharmacy, IZNF, Friedrich-Alexander University of Erlangen-Nurnberg, Cauerstr. 3, 91058 Erlangen, Germany.

†These authors contributed equally to the work

\* AM corresponding author – [a.manshina@spbu.ru](mailto:a.manshina@spbu.ru)

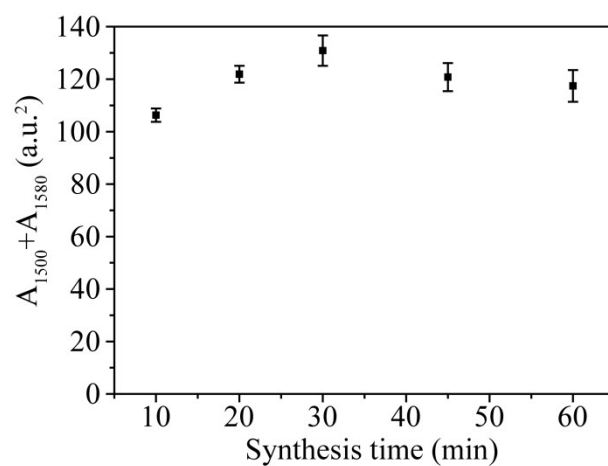

Fig. SI1. Sum of integral area of Q and B peaks obtained after decomposition in dependence on synthesis time.

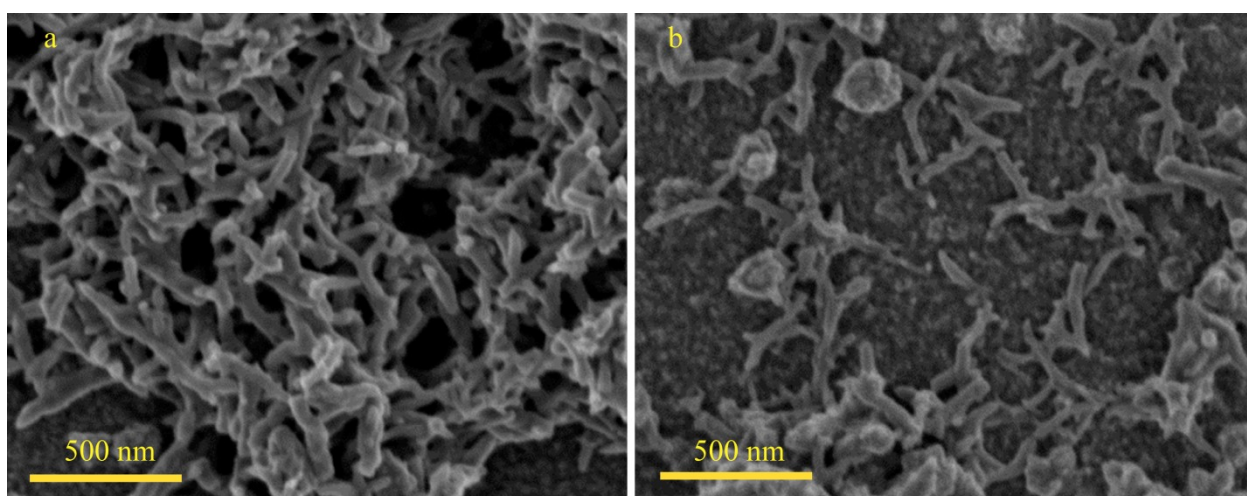

Fig SI2. SEM images of samples synthesized at different times a -30 min, b - 60 min

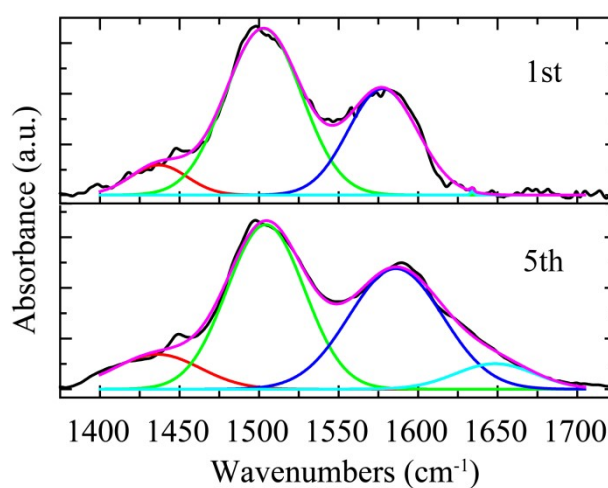

Fig. SI3. Example of peak decomposition in the FTIR spectra in 1375-1725  $\text{cm}^{-1}$  for 1<sup>st</sup> and 5<sup>th</sup> synthesis.
